# Supplementary material for: Single-cell transcriptome analysis reveals the targeting of epithelial and fibroblast interactions in ovarian cancer
Source: Research Square preprint supplement (doi:10.21203/rs.3.rs-8586120/v1), 2026-02-16
Supplement: Supplementary file 1 [file 65ed89d38d19d8bb0c120bb1.xlsx]

## Sheet: Supplementary Table 1
Sample ID	Sequencing platform	Tissue samples obtained	Histology type	Age	Disease stage at time of sampling	Clinical status at time of sampling	Tretment status when sampling	Upfront treatments (surgery or neoadjuvant chemotherapy)	Treatment after debulking surgery (sampling)	Response to chemotherapy	Origin
non-OCCC	10X Genomics	primary ovarian tumour	HGSOC	62	Ⅲc	Diagnosis	Treatment-naïve	No treatment	Platinum-base chemotherapy	Sensitive	left ovary
non-OCCC	10X Genomics	primary ovarian tumour, omentum metastatic tumour	HGSOC	45	Ⅳb	Diagnosis	Treatment-naïve	No treatment	Platinum-base chemotherapy	Sensitive	Bilateral ovary
non-OCCC	10X Genomics		HGSOC	45	Ⅳb	Diagnosis	Treatment-naïve	No treatment	Platinum-base chemotherapy	Sensitive	Bilateral ovary
non-OCCC	10X Genomics	primary ovarian tumour	HGSOC	53	Ⅲc	Diagnosis	Treatment-naïve	No treatment	Platinum-base chemotherapy	Sensitive	right fallopian & ovary
non-OCCC	10X Genomics	primary ovarian tumour	HGSOC	55	Ⅲc	Diagnosis	Treatment-naïve	No treatment	Platinum-base chemotherapy	Resistant	right ovary
OCCC	10X Genomics	primary ovarian tumour	non-HGSOC	58	Ⅲa1	Diagnosis	Treatment-naïve	No treatment	Platinum-base chemotherapy	unknown	left ovary
OCCC	10X Genomics	primary ovarian tumour	non-HGSOC	41	Ⅱb	Diagnosis	Treatment-naïve	No treatment	Platinum-base chemotherapy	Sensitive	right ovary
OCCC	10X Genomics	primary ovarian tumour	non-HGSOC	60	Ⅱb	Diagnosis	Treatment-naïve	No treatment	Platinum-base chemotherapy	Sensitive	right ovary
OCCC	10X Genomics	primary ovarian tumour	non-HGSOC	42	Ⅱb	Diagnosis	Treatment-naïve	No treatment	Platinum-base chemotherapy	Sensitive	left ovary
non-OCCC	10X Genomics	primary ovarian tumour	non-HGSOC	57	Ⅲa1	Diagnosis	Treatment-naïve	No treatment	Platinum-base chemotherapy	unknown	left ovary
